# Supplementary material
Source: Springer Nature journal article supplement (https://www.springermedizin.de/resource/supplementary/12931_2010_1031_MOESM4_ESM.pdf/9425598)

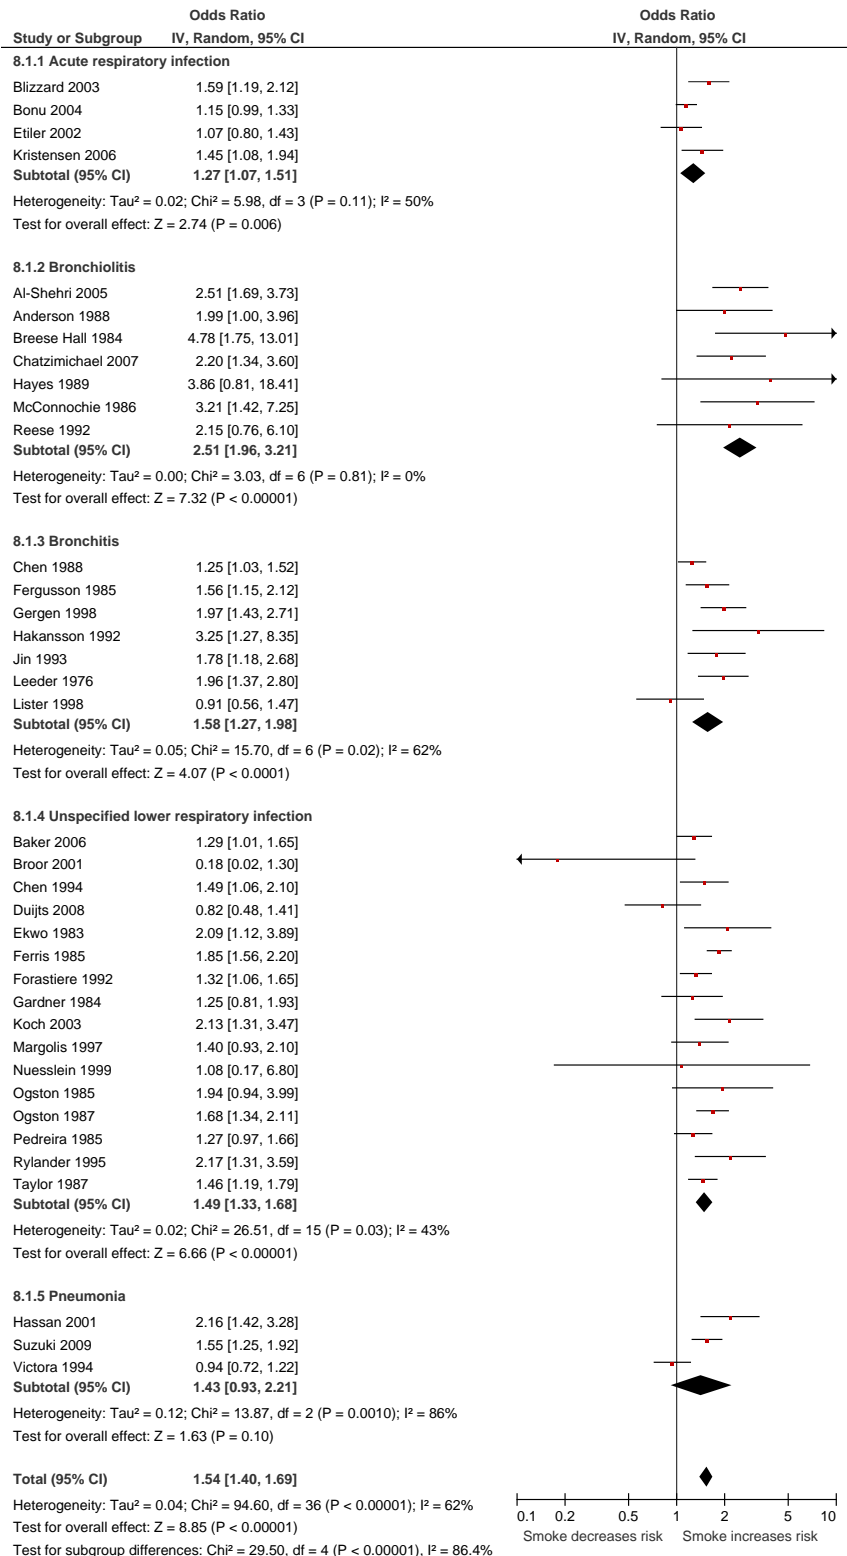

Supplement: MOESM4 [file 9425598]
